# Supplementary material for: Climate, environment and the fortunes of Buddhism during the Tibetan Empire 618-842 CE
Source: Research Square preprint supplement (doi:10.21203/rs.3.rs-1869806/v1), 2022-08-01
Supplement: Supplementary file 1 [file 643148a40f2e3af12984a0d1.docx]

**Electronic Supplemental Material**

*Geohumanities*

Geography has long been linked with subject matter in other disciplines, especially in the humanities, for example the *Journal of Historical Geography* (since 1975). The term *Geohumanities* has however recently come to prominence emphasising a renewed impetus for interdisciplinary research and scholarly activity linking Geography with the arts and humanities, and focussing on topics related to the key geographical pillars of place, space and environment (Geohumanities Forum; Magrane 2019). Popular topic areas in the new journal *GeoHumanities* (since 2015 - Association of American Geographers) have included the Anthropocene, climate change and environmental justice (Kwan & Ding, 2008; Schlosser 2018), but also analyses of historical topics such as railways and conflicts / wars (Kwan & Ding, 2008). Our research is of a similar vein, not only making use of historical records, but also employing dendroclimatological data, as successfully utilised by others on broader temporal and spatial scales (Büntgen et al., 2020). Dendrochronology is a powerful tool for dating archaeological contexts (Muigg et al., 2020) and sometimes even for fine-tuning written records (in the case of the dates and sources of roof timbers used in the construction of Salisbury Cathedral (UK) - Dan Miles pers. comm.). Drought-sensitive oak trees were able to confirm dry conditions during the construction of Charlemagne’s Fossa Carolina in southern Germany, but could not confirm the heavy rain that stopped this early Medieval example of hydroengineering, demonstrating the fallibility of tree-rings in weather-related rather than climatic reconstructions (Muigg et al., 2020). Geohumanities also embrace research into religious perceptions of natural disasters, that are often seen as *‘acts of God’* (Chester et al., 2019). Akasoy noted that both earthquakes and epidemics in the Middle Ages were viewed in Islamic literature as punishments for those disbelieving The Prophet or for *‘moral misbehaviour’* (a similar theme observed in Tibet in our research). These disasters could kill both the pious and unbelievers, for whom death could be a blessing (resulting in martyrdom) or punishment respectively (Akasoy, 2007). Even today religion can utilise natural disasters as forces for social influence. Following the 2009 CE earthquake and tsunami that hit Samoa, religious assistance / aid was deployed to combat the mental and other traumas of the disasters. Divine retribution was however utilised to promote on one hand traditional practices and obligations by established Christian churches, whilst on the other, new churches (also Christian) used the same observation to recommend social and religious change in locii ripe for proselytizing (Holmgaard, 2019).

**References**

Akasoy A (2007) Islamic attitudes to disasters in the Middle Ages: a comparison of earthquakes and plagues. Medieval History Journal 10(1-2): 387-410.

Büntgen U, Arseneault D, Boucher E et al. (2020) Prominent role of volcanism in Common Era climate variability and human history. Dendrochronologia 64: 125757.

Chester DK, Duncan AM & Speake J (2019) Earthquakes, volcanoes and God: comparative perspectives from Christianity and Islam. GeoHumanities 5(2): 444-467.

Geohumanities Forum <https://geohumanitiesforum.org/about/> (Accessed 18 February 2022)

Holmgaard SB (2019) The role of religion in local perceptions of disasters: the case of post-tsunami religious and social change in Samoa. Environmental Hazards 18(4): 311-325.

Kwan MP, & Ding G (2008) Geo-narrative: extending geographic information systems for

narrative analysis in qualitative and mixed-method research. Professional Geographer 60(4): 443-465.

Magrane E (2019) Applying the Geohumanities. International Journal of Applied Geospatial Research 10(2): 27-38.

Muigg B, Seim A, Tegel W et al. (2020) Tree rings reveal dry conditions during Charlemagne’s Fossa Carolina construction in 793 CE. Quaternary Science Reviews 227: 106040.

Schlosser K (2018) Geohumanities and climate change scepticism. Geography Compass 12: 12402.
