# Supplementary material for: Climate, environment and the fortunes of Buddhism during the Tibetan Empire 618-842 CE
Source: Research Square preprint supplement (doi:10.21203/rs.3.rs-1869806/v1), 2022-08-01
Supplement: Supplementary file 2 [file 9179734833f04eab69bc2120.xlsx]

## Sheet: Sheet1
	233	First Buddhist text enters Tibet (?)
	618	Foundation of the Tibetan Empire (TE), capital in the Yarlung Valley
		(First King of Tibet Nyatri Tsenpo arrived from India)
	630s	New religion sought by Yarlung Dynasty (King Songtsen Gampo)
	739	Death of the Chinese Princess of Jincheng (wife of King Me Agstom alias Trhi Detsuktsen 704-755/6)
		‘…when the black pox [smallpox] appeared at her heart’. She had promoted Buddhist funerary rites
		and temple building
	739-741	First official prohibition of Buddhism (the religion is thought to have been present in Tibet for
		over a century). Buddhist clergy [Samgha] were blamed for the smallpox outbreak and ‘other
		diseases’ and were banished to Gandhāra, India
	755/756	'Revolt': King Me Agstom was assassinated by two of his ministers. The subsequent power struggle
		culminated in the enthronement of his son [legitimate heir?], Trisong Detsen in 756 CE.
		Buddhism continued to be supressed by ‘ministerial conspiracy’
	761-762	Buddhism adopted as the official religion of the TE and was promoted by the first ‘Religious’ King,
		Trisong Detsen (740-798 CE). Buddhism's hierarchical structures, may have facilitated the
		legitimization and protection of the new King, but it may also have been better placed than
		traditional beliefs to provide comfort to victims of disease, conflict and other hardships.
		Buddhism flourished during the Golden Age with royal patronage. Monasteries gained
		economic independence through tax laws and related powers, and Buddhist monks became
		powerful government ministers
	763	Tibetan army captured and occupied Chang’an (Tang Dynasty capital). During the next two decades,
		nearly all of the major oasis cities and towns along the Gansu Corridor were annexed by the TE
	779	Consecration of the first Buddhist monastery in Tibet at Samye
	786	Dunuang important trading town and oasis on the Silk Road invaded and controlled (until 848 CE).
		Mogao Buddhist cave temples – source of the Old Tibetan ‘Dunuang’ Annals (today - UNESCO WHS)
	822-3	Treaty dictated by Tibet to the Uigurs
	836	Discontent amongst lay officials due to the apparent weakness of King Ralpachen (815-836 CE) and
		the perceived power and excesses of Buddhism (Buddhist monks involved in government)
		Rumours of an important monk’s affair with King’s chief queen, led to the monk’s execution, the
		queen’s suicide and later the King’s assassination
	841-842	Second official prohibition of Buddhism following interventions by Lang Darma, the 41st and last
		Tibetan King, which led to his assassination by a Buddhist monk
	842	Collapse of TE
	[842]	[Huichang Persecution of Buddhism by imperial edict initiated by Tang Emperor Wuzong: crackdown
		on Buddhist shrines, property, monks and nuns, attributed to deteriorating government finances and
		a desire to cleanse China of foreign influences]
	Tab. 1. Chronology of key historical events associated with the fortunes of Buddhism and the Tibetan Empire 618 – 642 CE ( 3, 5, 18, 19, 25, 30, 31, 32, 33, 34, 35, 36, 37).
