# Supplementary material for: Climate, environment and the fortunes of Buddhism during the Tibetan Empire 618-842 CE
Source: Research Square preprint supplement (doi:10.21203/rs.3.rs-1869806/v1), 2022-08-01
Supplement: Supplementary file 3 [file e2c35dd917c8308c35e388a0.xlsx]

## Sheet: Tab 1 
Date (CE)	Event	Region affected	Record	Source
739-741	1st Prohibition of Buddhism	Tibetan Empire
739 (Jan)	Heavy snow & rain Chang’an (Xi'an), capital of the Tang Dynasty	NW China	TD	OBT, Vol.9
739 (March)	Floods Lizhou (Hunan), Yuanzhou and Jiangzhou (both Jiangxi) and other regions	S China	TD	NBT, Vol.36
740 (March)	Floods Henan (Shandong, Henan, northern Jiangsu & northern Anhui)	N China	TD	NBT, Vol.36
741 (July)	Floods Yi & Luo rivers (Henan): crops, bridges & houses destroyed and 1000+ people killed	N China	TD	NBT, Vol.36
741 Autumn	Twenty four counties in Henan and Hebei suffered floods (Henan, Hebei & Shangdong)	N China	TD	NBT, Vol.36
741 (September)	Heavy snow and rain hit Chang’an (Xi'an)	NW China	TD	NBT, Vol.36
762-763	Buddhism adopted as official religion	Tibetan Empire
761	Famine in Yangtse & Huaihe River Basins, so severe it led to cannibalism	S China	TD	ZT, Vol.222
762	Severe epdemic Jiangdong (Zhejiang, Fujian & southern Jiangsu) Killed half the population	SE China	TD	NBT, Vol.36
762	Drought. No rain July to August in Chang’an (Xi'an)	NW China	TD	OBT, Vol.11
762	Famine Jiangzhou (Shanxi)	N China	TD	ZT, Vol.222
763	Flood & drought hit Zhejiang, people suffering hardship. The Emperor asked the government not to buy supplies from the victims & to bury those who had died of the plague	SE China	TD	NBT, Vol.6
763 (Autumn)	Crops attacked by pests in autumn. Guanzhong (Shanxi) hit hardest	N China	TD	NBT, Vol.35
763 (September)	Heavy rain causing flooding in Chang'an (Xi'an)	NW China	TD	NBT, Vol.36
841-842	2nd Prohibition of Buddhism	Tibetan Empire
839	Crops suffered pests in Henan (Shandong, Henan, northern Jiangsu & northern Anhui)	N China	TD	NBT, Vol.35
839	Jiangxi (Jiangxi & Hunan) suffered rodent pests (rats)	S China	TD	NBT, Vol.34
839	Famine led to an epidemic. Snowstorms killed most of the sheep and horses in the Uyghur Khaganate (WHERE TODAY?)	Mongolian Plateau	UyKh	NBT, Vol.217
839	The Uyghur Khaganate (WHERE?) fell (regime change) because of epdimics and heavy losses of sheep and horses due to snowstorms	Mongolian Plateau	UyKh	ZT, Vol.246
839 (May)	Tianping (Shangdong), Weibo (Hebei, Shangdong & Henan), Yiding (Hebei) & other regions suffered locust disasters	N China	TD	OBT, Vol.17
839 (Summer)	Chang'an (Xi'an) suffered Drought. Emperor Wennzong was very anxious when prayers were not answered	NW China	TD	OBT, Vol.36
839 (July)	Hailstorms in Zhengzhou (Zhengzhou City, Henan), Huazhou (Huaxian County, Henan) and other regions	N China	TD	NBT, Vol.36
839 (August)	Zhenzhou (Zhending City, Hebei) Jizhou (Hengshui City, Hebei) and other regions suffered locust disasters	N China	TD	OBT, Vol.17
839 Autumn	Heavy rainfall caused floods in Xichuan (Sichuan), Cangjing (Hebei) and Ziqing (Shangdong)	W China / N China	TD	NBT, Vol.36
839 (September)	Heavy snow and rain froze trees in Chang'an (Xi'an)	NW China	TD	NBT, Vol.34
839 (November)	Another' earthquake in Chang'an (Xi'an)	NW China	TD	NBT, Vol.35
c.839	An earthquake struck the country, causing springs, landslides and the Tao River to reverse its flow for three days. Rats destroyed crops. People starved to death due to epidemics	Tibet	TE	NBT, Vol.216
c.839-841	Lhasa was hit by frosts and droughts. Crops were infected with rust. Livestock and people were infected with plague	Tibet	TE	TB
c.839-841	There was a big earthquake. Boundary mountains on the Han - Tibet border 'fell over'. The Tao River was blocked for three days	Tibet	TE	SF
c.839-841	Frequent hail and droughts. Farmlands were barren. Famine 'broke forth'. People and livestock suffered from epdemics	Tibet	TE	CMRG
840 (June)	Thirty-six people and a large number of cattle and horses died in Puzhou (Juanchen County, Shandong) due to a hailstorm	N China	TD	NBT, Vol.36
840 (June)	The Emperor (Wuzong) was prevented from using the throne room - an act of contrition before God in order to end the disaster	NW China	TD	NBT, Vol.8
	The Emperor also ordered subordinates to conduct trials as wrongful conviction of prisoners could also have caused the disaster/s	NW China	TD	NBT, Vol.8
840 (July)	Zhenzhou (Zhending City, Hebei) and Jiangnan (Zhejiang, Jiangsu & Anhui) suffered floods	N China / E China	TD	NBT, Vol.36
840 (summer)	Youzhou, Weizhou, Bozhou, Yunzhou, Caozhou, Puzhou, Cangzhou, Qizhou, Dezhou, Zizhou, Qingzhou, Yanzhou, Haizhou, Heyang, Huainan, Guozhou, Chenzhou, Xuzhou, Ruzhou and	China	TD	NBT, Vol.36
	other regions (Yellow River & Yangtze River Basins) suffered ‘serious pests’
840 (summer)	Epidemics struck Fuzhou, Jianzhou, Taizhou and Mingzhou (Zhejiang & Fujian)	SE China	TD	NBT, Vol.36
841 (July)	Floods hit Jiangnan (Zhejiang, Jiangsu & Anhui), and the Hanjiang River flooded Xiangzhou (Xiangyang City, Hubei), Junzhou (Shiyan City, Hubei) and other regions	E China / C China	TD	NBT, Vol.36
841 (July)	Guandong (Luoyang & Henan), Dengzhou (Dengzhou City & Henan), Tangzhou (Biyang County & Henan) and other regions suffered locusts	N China	TD	NBT, Vol.36
	Tab. 2 'Disasters' recorded in the annals of the Tibetan Empire (TE), Uyghur Khaganate (UyKh) and the Tang Dynasty, China (TD) and their coincidence with the three key events in early Tibetan Buddhism (present-day locations in bold) (22,23,24,25,26,39).
